# Supplementary material for: Recovery rate and homogeneity of doping europium into luminescent metal hydrides by chemical analysis
Source: Royal Society of Chemistry journal article supplement (doi:10.1039/c4ra14076a), 2015-01-01
Supplement: c4ra14076a1.pdf [file c4ra14076a1.pdf]

## Electronic Supporting Information

### Recovery rate and homogeneity of doping europium into luminescent metal hydrides by chemical analysis

Ramona Hahn<sup>a</sup>, Nathalie Kunkel<sup>a,b,‡</sup>, Christina Hein<sup>a</sup>, Ralf Kautenburger<sup>a</sup>, Holger Kohlmann<sup>b\*</sup>

<sup>a</sup> Inorganic Solid State Chemistry, Saarland University, P.O. Box 151150, 66041 Saarbrücken, Germany

<sup>b</sup> Inorganic Chemistry, University Leipzig, Johannisallee 29, 04103 Leipzig, Germany. Email: holger.kohlmann@uni-leipzig.de

<sup>‡</sup> Current institution: Chimie Paristech-CNRS, Institut de Recherche de Chimie Paris, 11 rue Pierre et Marie Curie, 75005 Paris, France

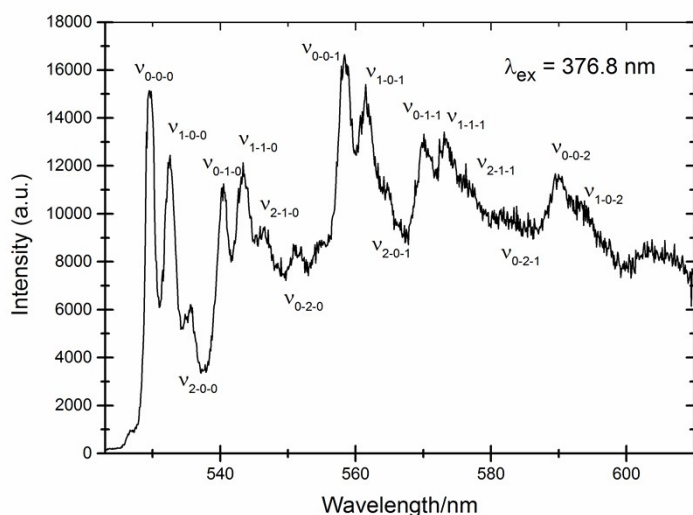

**Figure 1** High resolution emission spectrum of  $\text{LiSrH}_3:\text{Eu}^{2+}$  0.0037 mol % at 10 K. The small band at  $19011\text{ cm}^{-1}$  is due to anti stokes.

In the assignment of the vibronic lines in Fig. 1 with  $v_{x-y-z}$  the number  $x$  indicates the vibronic replica of the lower energy  $100\text{ cm}^{-1}$  vibration, the number  $y$  the  $370\text{ cm}^{-1}$  vibration and  $z$  the third vibrational mode at about  $970\text{ cm}^{-1}$ .

**Table 1** Vibronics in the emission spectrum at 10 K für the  $4f^65d^1-4f^7$  transition of  $\text{Eu}^{2+}$  in  $\text{LiSrH}_3:\text{Eu}^{2+}$  0.0037 mol %. The energy of the vibrational modes is given with respect to their zero phonon lines.

| Line        | $\Delta E$ [ $\text{cm}^{-1}$ ] |
|-------------|---------------------------------|
| $V_{1-0-0}$ | 102                             |
| $V_{2-0-0}$ | 214                             |
| $V_{0-1-0}$ | 373                             |
| $V_{1-1-0}$ | 479                             |
| $V_{2-1-0}$ | 584                             |
| $V_{0-2-0}$ | 740                             |
| $V_{0-0-1}$ | 970                             |
| $V_{1-0-1}$ | 1072                            |
| $V_{2-0-1}$ | 1179                            |

|                    |      |
|--------------------|------|
| v <sub>0-1-1</sub> | 1340 |
| v <sub>1-1-1</sub> | 1435 |
| v <sub>2-1-1</sub> | 1559 |
| v <sub>0-2-1</sub> | 1688 |
| v <sub>0-0-2</sub> | 1912 |
| v <sub>1-0-2</sub> | 2024 |

---
